# Supplementary material for: Seten: a tool for systematic identification and comparison of processes, phenotypes, and diseases associated with RNA-binding proteins from condition-specific CLIP-seq profiles
Source: PubMed Central journal article supplement — RNA. 2017 Jun;23(6):836–46. doi: 10.1261/rna.059089.116 (PMC5435856; doi:10.1261/rna.059089.116), 2017-06

Figure S2. The dynamically generated bubble chart from Seten WI, showing the comparison of significantly enriched MalaCards Disease Ontology terms for DDX6 in K562 and HepG2 cell lines. Only gene sets which had more than 5% of the total genes and exhibited a minimal p-value of 0.05 in one of the cell lines are included in this comparison. The radius of bubbles is computed as negative Log10(corresponding p-value).

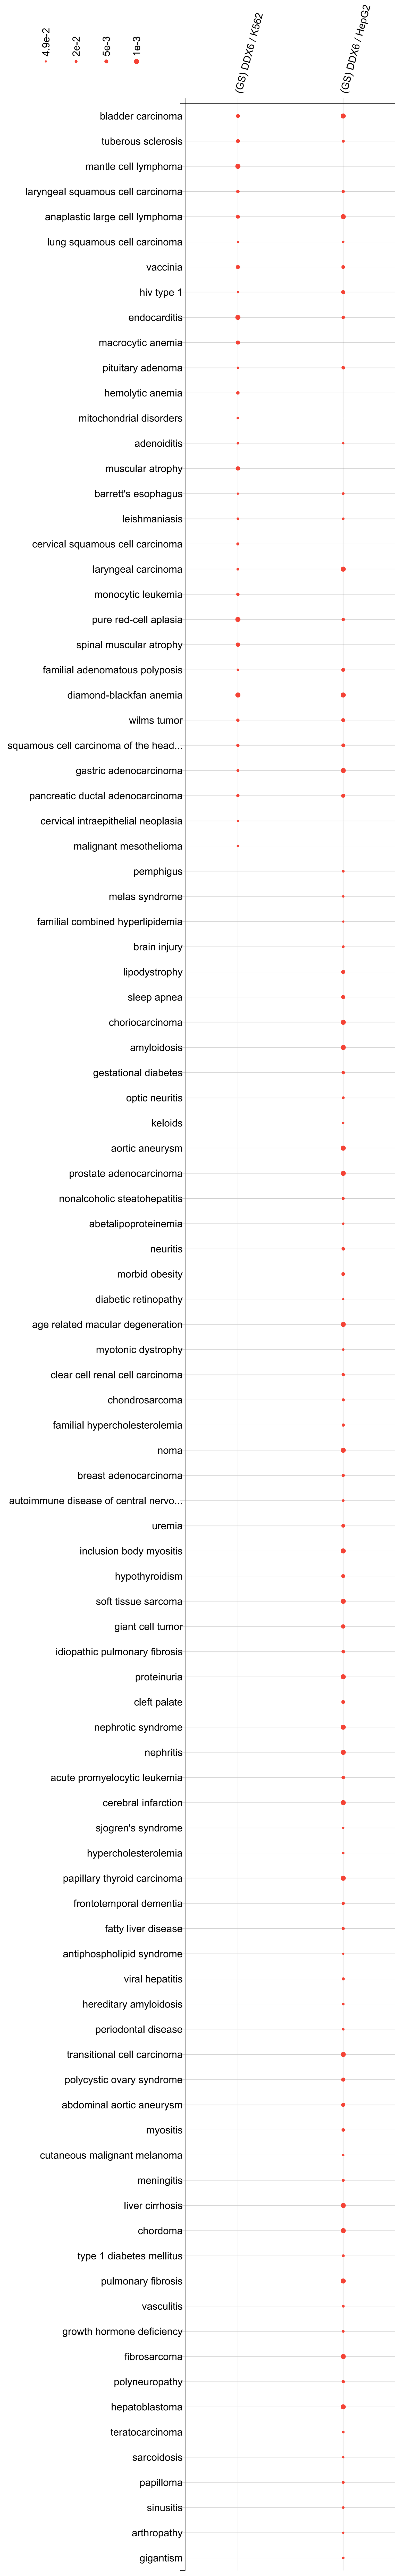

Supplement: supp_059089.116_Supplemental_Figure_S2.pdf [file supp_059089.116_Supplemental_Figure_S2.pdf]
