# Supplementary material for: Seten: a tool for systematic identification and comparison of processes, phenotypes, and diseases associated with RNA-binding proteins from condition-specific CLIP-seq profiles
Source: PubMed Central journal article supplement — RNA. 2017 Jun;23(6):836–46. doi: 10.1261/rna.059089.116 (PMC5435856; doi:10.1261/rna.059089.116), 2017-06

(A) All Gene Set Collections

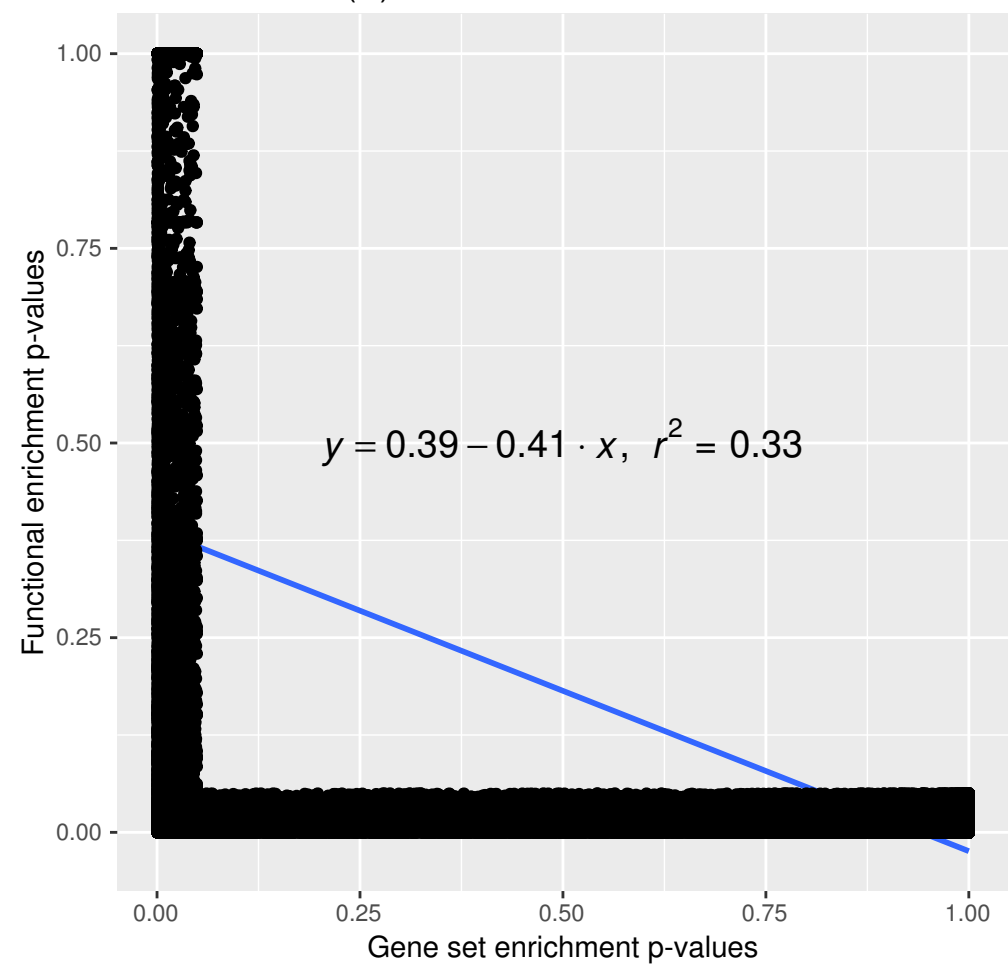

(B) Pathways: Reactome

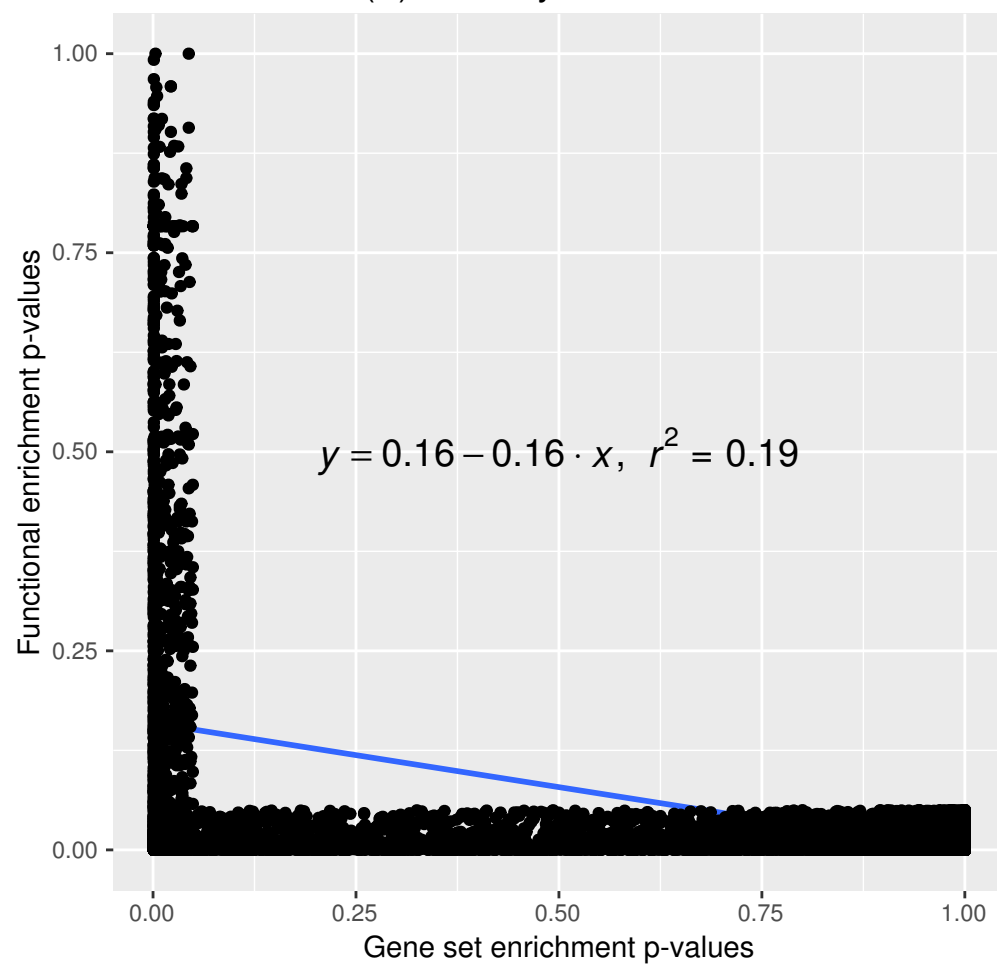

(C) Pathways: BioCarta

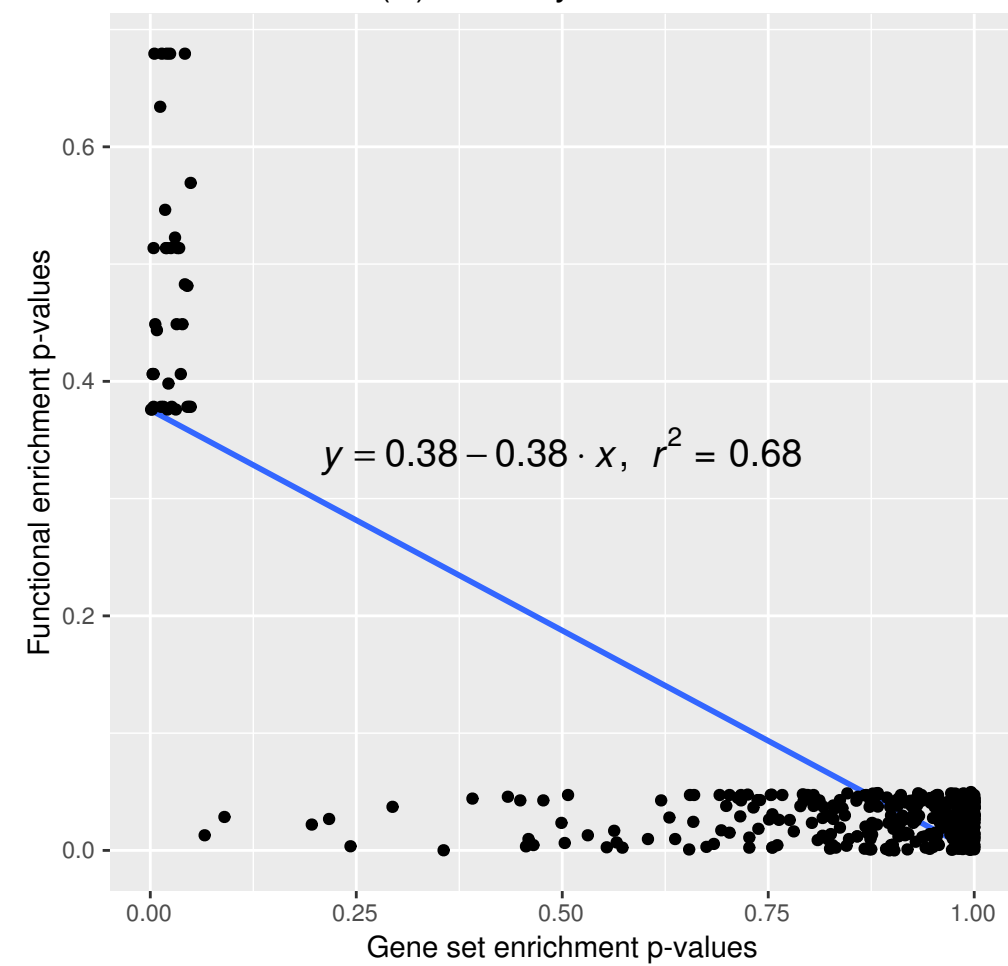

(D) Pathways: KEGG

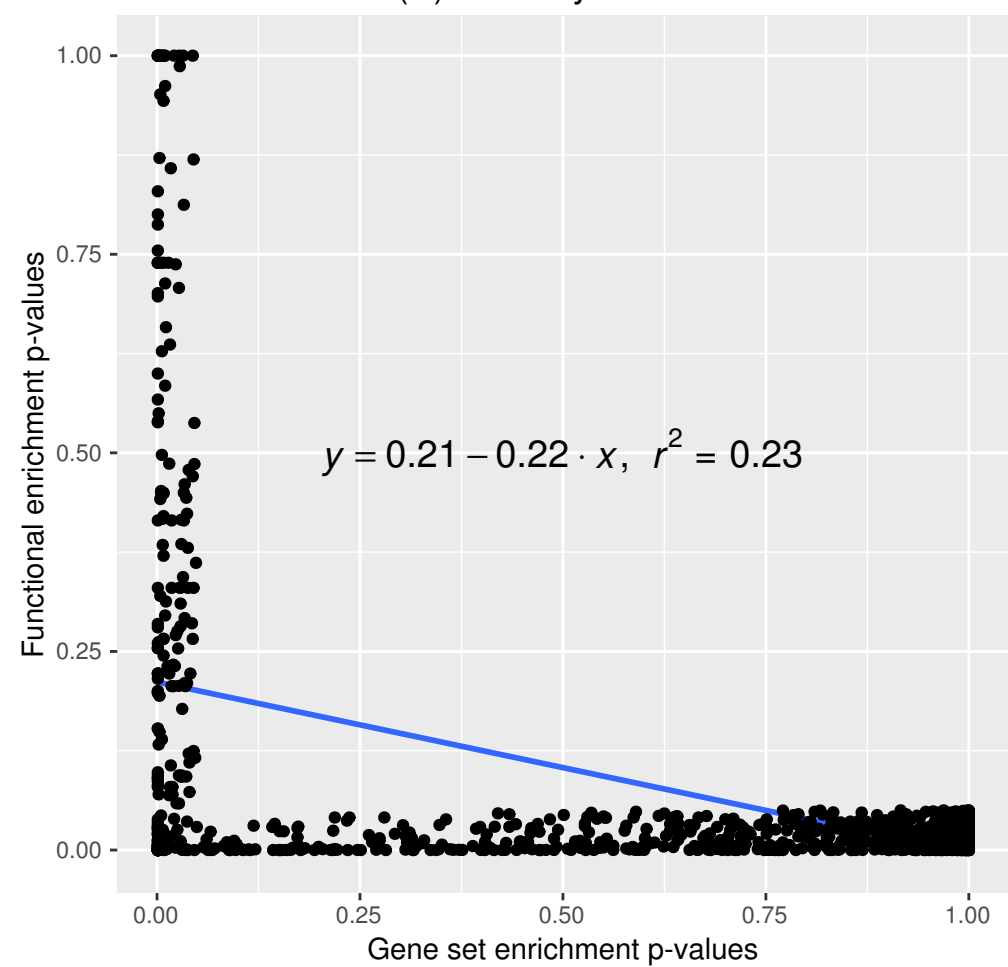

(E) GO: Biological Process

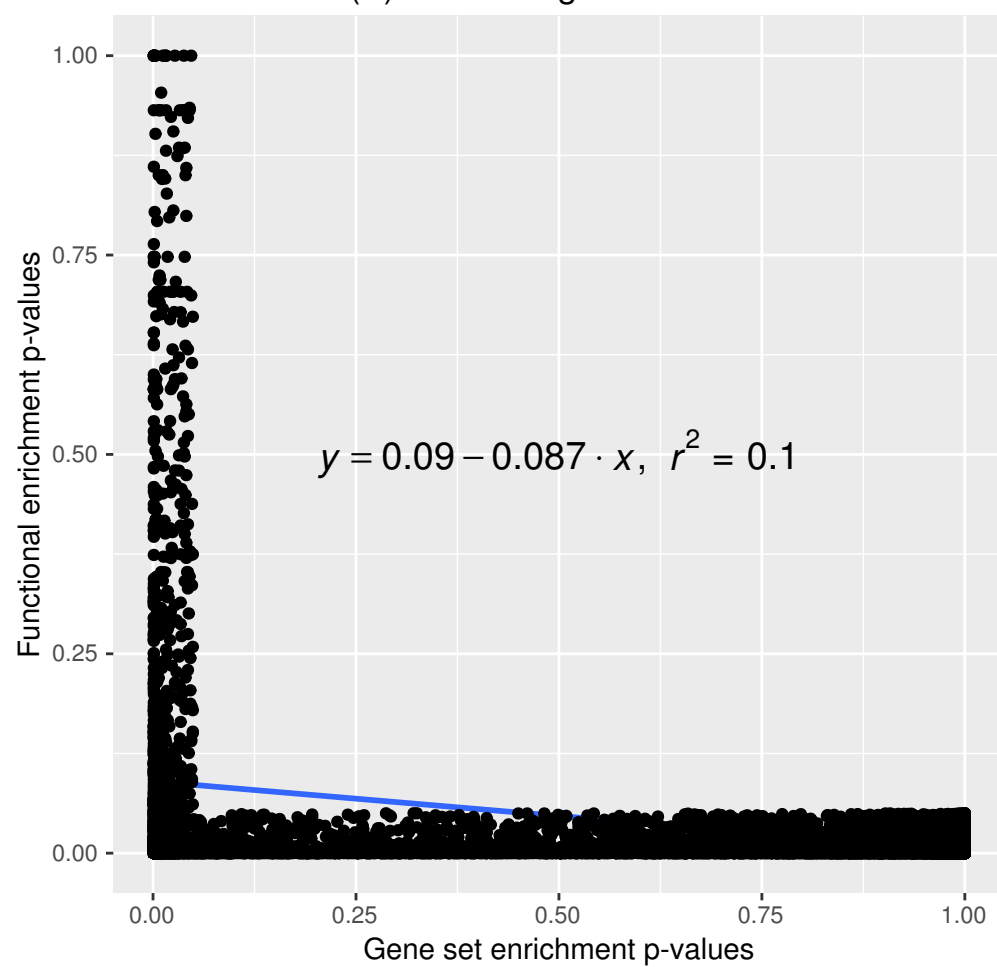

(F) GO: Molecular Function

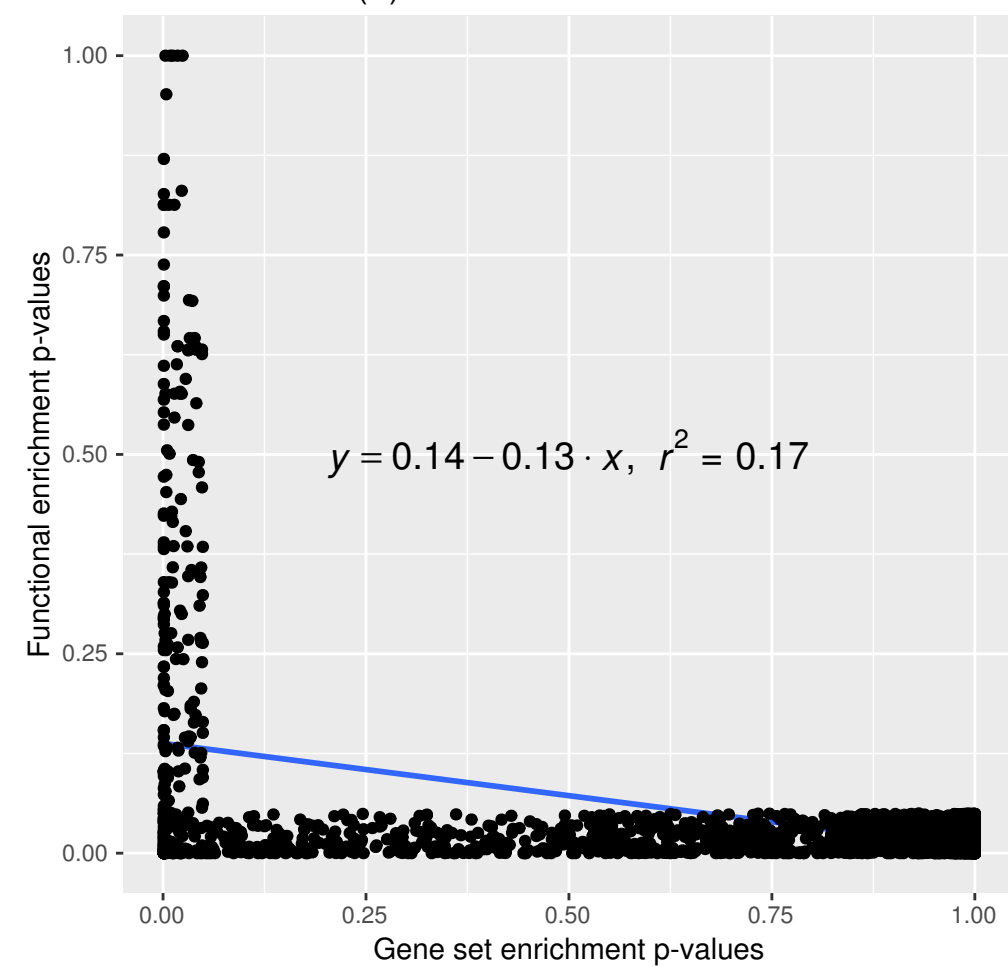

(G) GO: Cellular Compartment

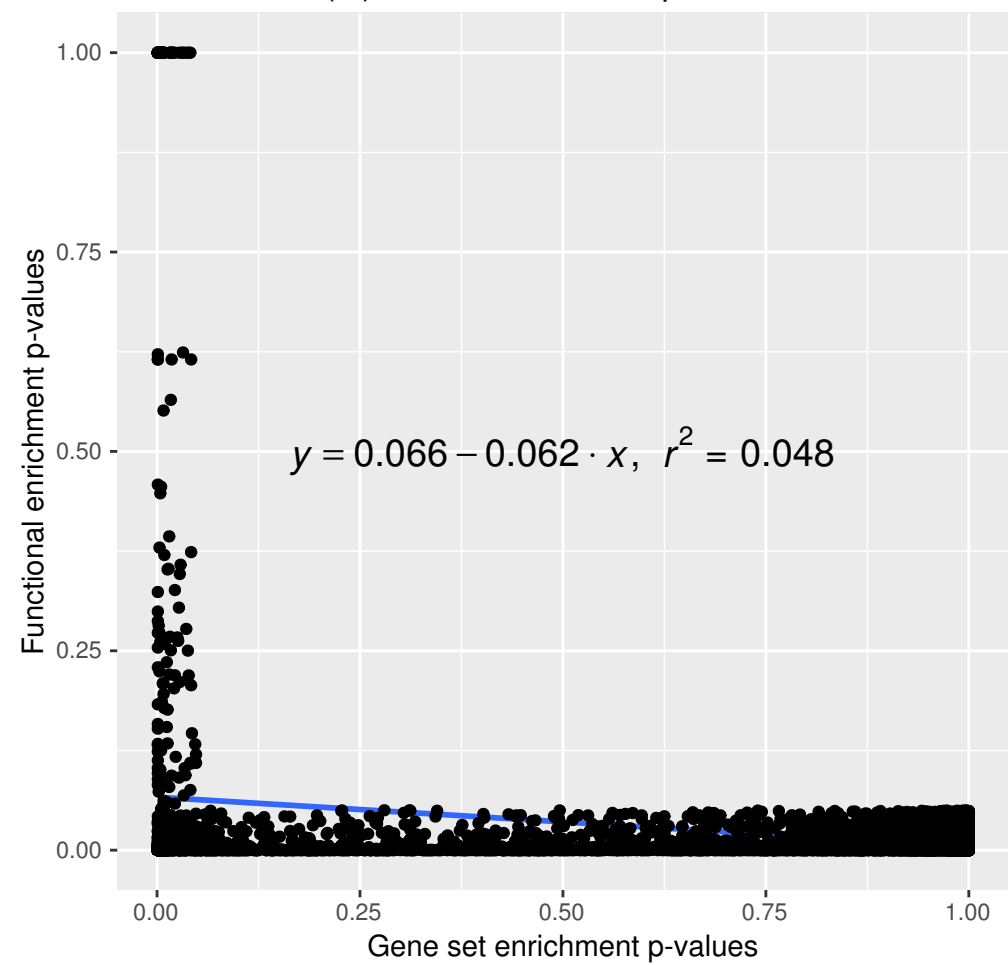

(H) Human Phenotype Ontology

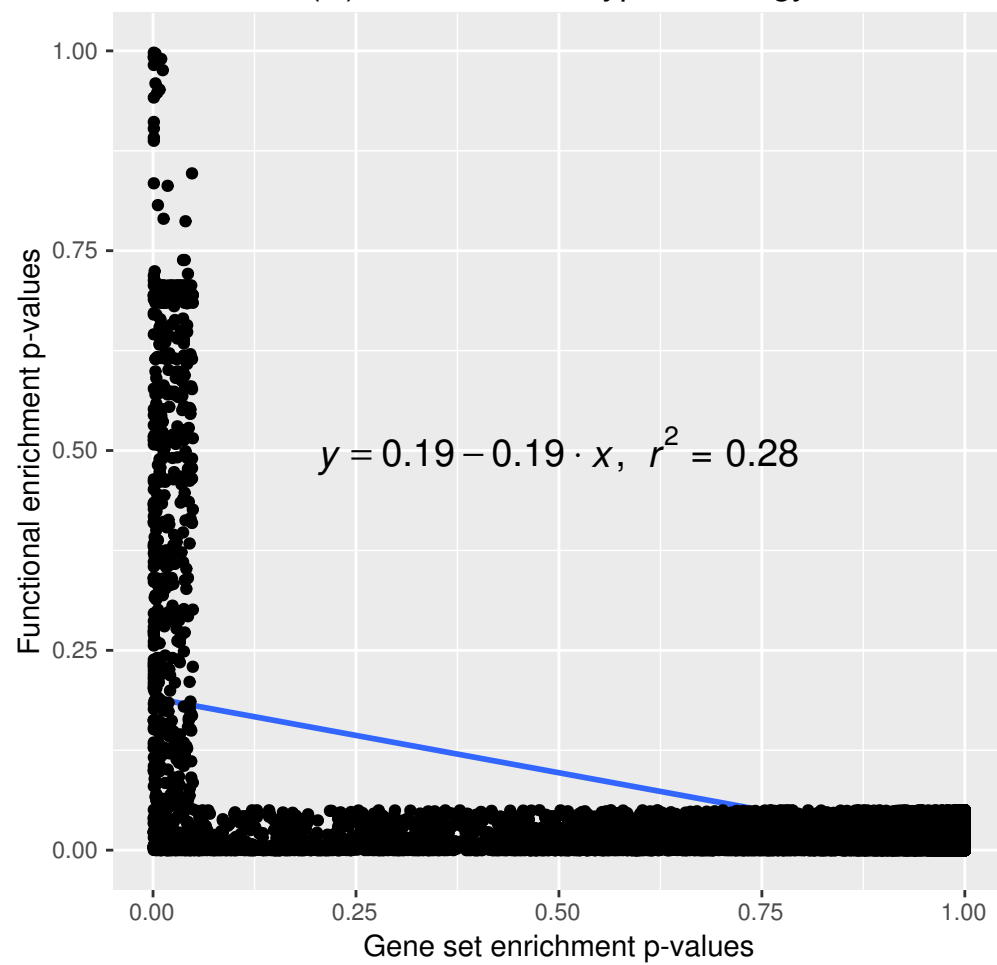

(I) MalaCards Disease Ontology

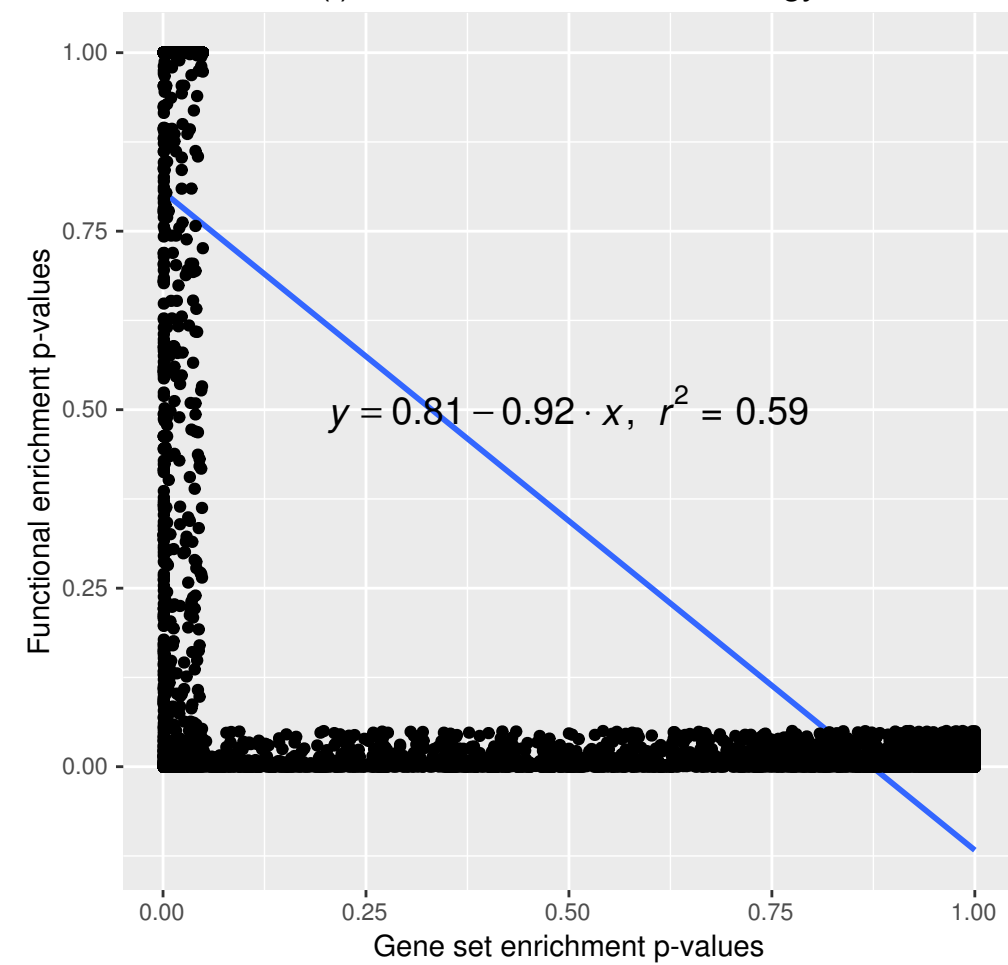

Supplement: supp_059089.116_Supplemental_Figure_S3.pdf [file supp_059089.116_Supplemental_Figure_S3.pdf]
